# Supplementary material
Source: MDPI journal article supplement (https://www.mdpi.com/2571-9637/4/4/26)
Supplement: s1 [file s1]

# Supplementary Materials: Flexible, Biocompatible PET Sheets: A Platform for Attachment, Proliferation and Differentiation of Eukaryotic Cells

Soumen Samanta, Diana Gaad, Eva Cabet \*, Alain Lilienbaum, Ajay Singh, Dinesh K. Aswal and Mohamed M. Chehimi \*

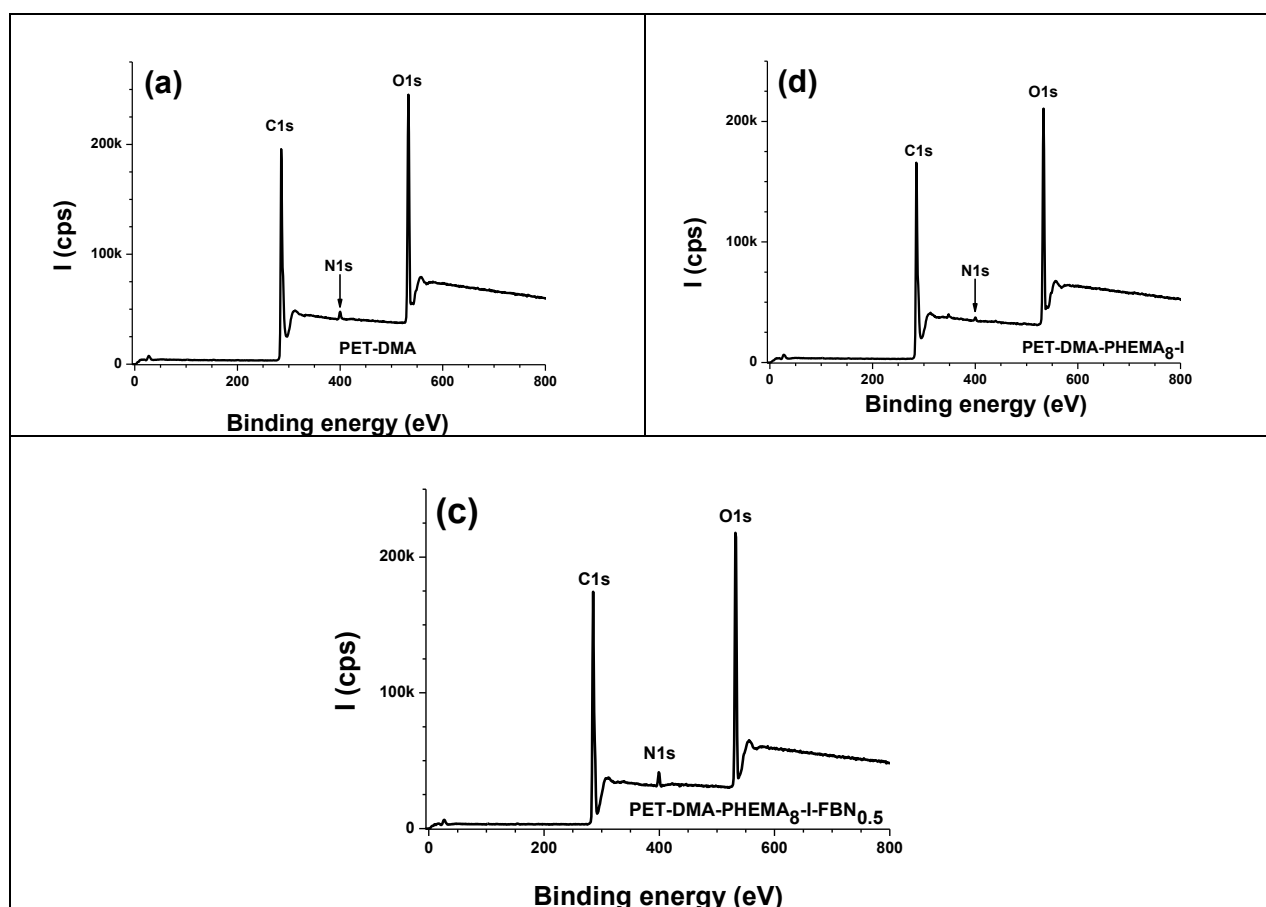

**Figure S1.** Survey regions of modified PET. (a): PET-DMA, (b) PET-DMA-PHEMA-I, and (c): PET-DMA-PHEMA-I-FBN<sub>0.5</sub>.

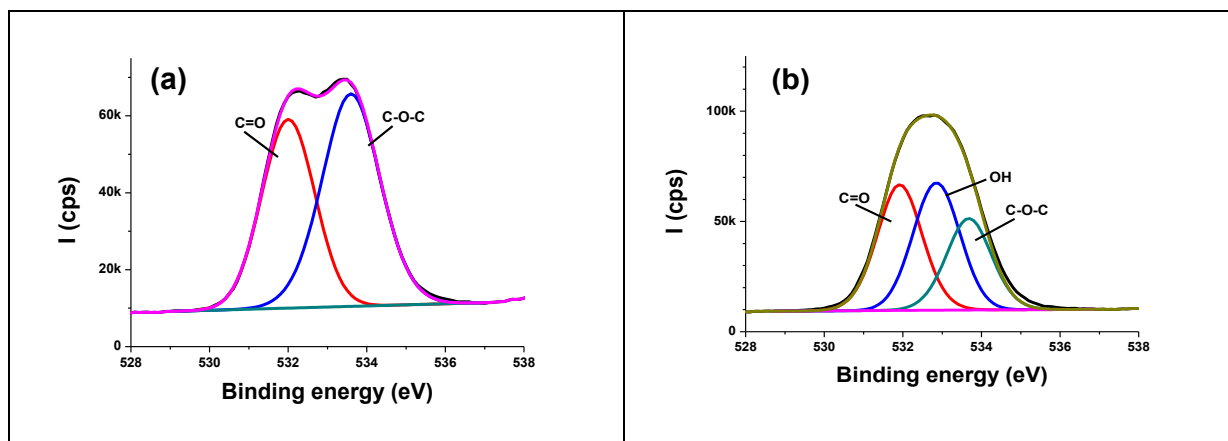

**Figure S2.** High resolution O1s regions from (a) PET, and (b) PET-DMA-PHEMA.

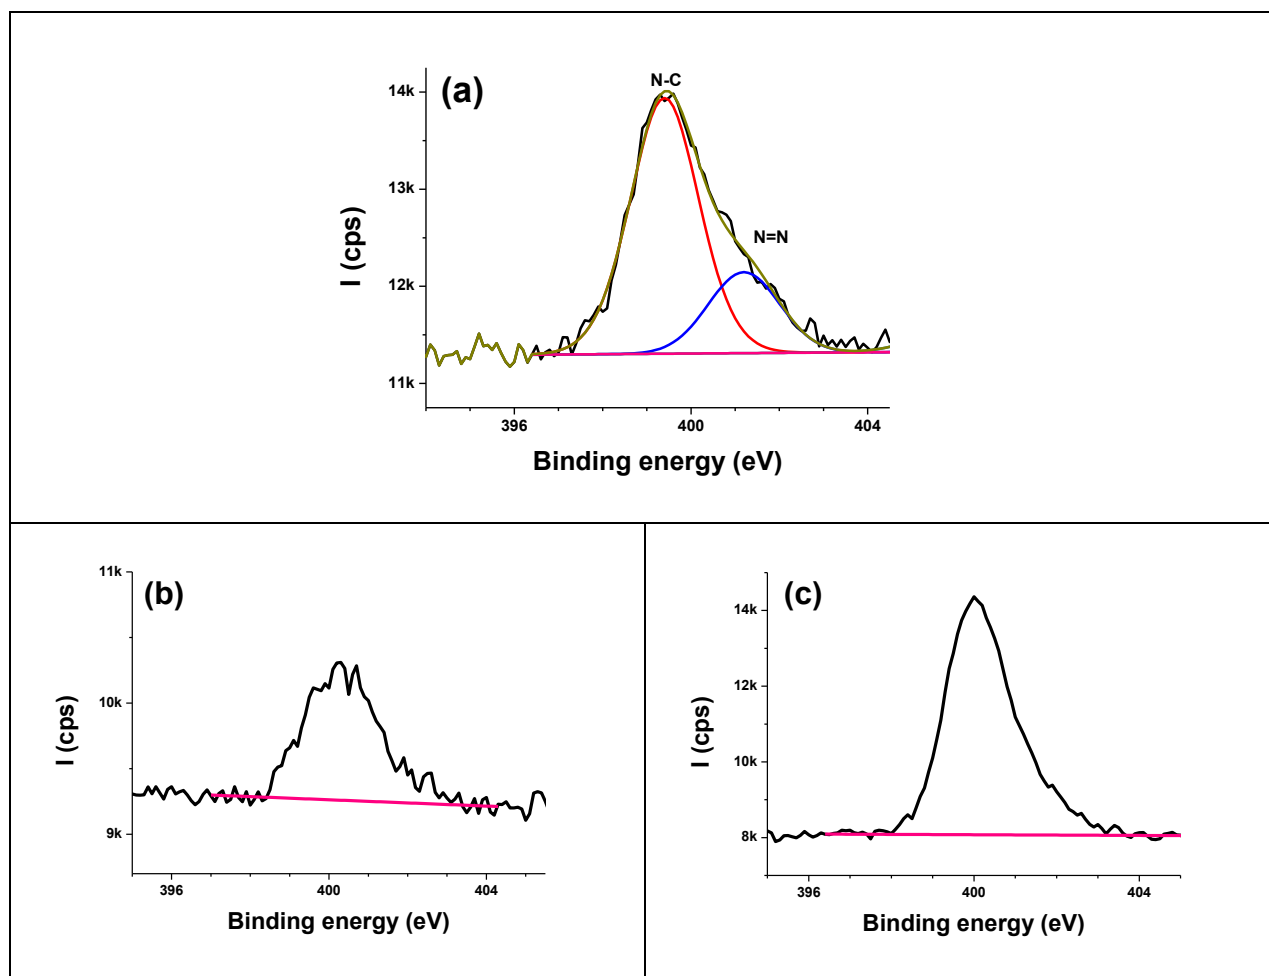

**Figure S3.** High resolution N1s regions from (a) PET-DMA, (b) PET-DMA-PHEMA-I, and (c) PET-DMA-PHEMA-I-FBN<sub>5</sub>.

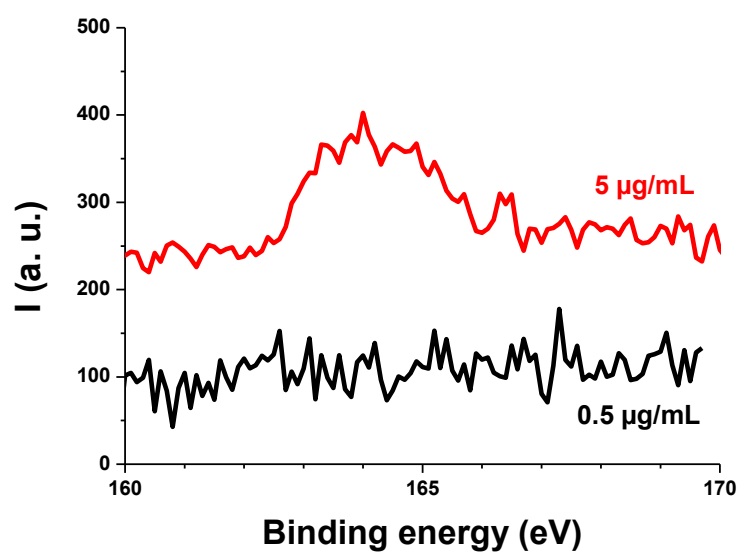

**Figure S4.** S2p narrow regions from PET-DMA-PHEMA-I-FBN prepared with an initial fibronectin concentration of 0.5 and 5 µg/mL.
